# Supplementary material for: Cobalt doped Mo5N6 as a noble-metal-free novel cocatalyst for promoting photocatalytic hydrogen production of g-C3N4 nanosheets
Source: Royal Society of Chemistry journal article supplement (doi:10.1039/d1qm01471d), 2022-01-01
Supplement: d1qm01471d1.pdf [file d1qm01471d1.pdf]

## Supporting Information

### **Cobalt doped Mo<sub>5</sub>N<sub>6</sub> as a noble-metal-free novel cocatalyst for promoting photocatalytic hydrogen production of g-C<sub>3</sub>N<sub>4</sub> nanosheets**

*Pengyuan Qiu<sup>a</sup>, Ruhao Hu<sup>a</sup>, Xinyu Wang<sup>a</sup>, Yanjun Xue<sup>a</sup>, Jian Tian<sup>\*,a</sup>, Xiaobo Chen<sup>\*,b</sup>*

*<sup>a</sup> School of Materials Science and Engineering, Shandong University of Science and  
Technology, Qingdao 266590, China*

*<sup>b</sup> Department of Chemistry, University of Missouri, Kansas City, MO 64110, USA*

*\* Corresponding authors. E-mail addresses: [jiantian@sdust.edu.cn](mailto:jiantian@sdust.edu.cn) (J. Tian),  
[chenxiaobo@umkc.edu](mailto:chenxiaobo@umkc.edu) (X. Chen)*

#### **Characterization**

The XRD patterns were carried out by a Bruker D8 Advance powder X-ray diffractometer. The surface characteristic of samples was measured on a scanning electron microscope (FEI Nova Nanosem 450). The crystal structure and morphology of samples were measured by a high-resolution transmission electron microscope (HR-TEM) (FEI Tecnai F30). The XPS was measured on a Thermo ESCALAB 250XI instrument. The UV–Vis DRS spectra were measured by a Hitachi UV-2550 UV–Vis spectrophotometer.

#### **Photoelectrochemical measurements**

The photocurrent response and electrochemical impedance of samples were measured via an electrochemical workstation (Shanghai Chenhua CHI660D) in a three-

electrode system, in which the sample electrode is used as the photocathode, Ag/AgCl as the reference electrode, a Pt wire as the counter electrode, 0.5 M Na<sub>2</sub>SO<sub>4</sub> aqueous solution as the electrolyte. The working electrodes were prepared as follows: 25 mg photocatalysts and 1 mg ethyl cellulose were dispersed into a solution containing 0.5 mL terpineol and 0.5 mL ethanol by 25 min sonication to prepare a homogeneous slurry. Then, 0.4 mL of the slurry was dropped onto the pretreated stannic oxide (FTO) conductive glass with an exposed area of 4.0 cm<sup>2</sup> (2 cm×2 cm). The 500 W Xe arc lamp equipped with an AM-1.5 filter was adopted as the light source. For EIS measurement, the amplitude of the measurement was 5 mV and the frequency range of the measurement was 10<sup>-2</sup>~10<sup>5</sup> Hz. For Mott-Schottky plot measurement, the amplitude of the measurement is 5 mV and the frequency of the measurement was 1000 Hz.

### **Photocatalytic H<sub>2</sub> evolution**

Photocatalytic H<sub>2</sub> production experiments were carried out in an outer irradiation type photoreactor (100 mL quartz glass) in an N<sub>2</sub> environment. 25 mg sample was dispersed with a mechanical stirring in a 100 mL aqueous solution containing 20 vol % triethanolamine further photocatalytic H<sub>2</sub> production experiment. Before irradiation, the photocatalytic system was thoroughly degassed to remove air by bubbling N<sub>2</sub> for 20 min. The irradiation light source used in this study was a 300 W Xe arc lamp (CELHXF300, Beijing China Education Au-light Co., Ltd.), which is equipped with an AM-1.5 filter. The evolved gas was analyzed by a gas chromatograph (Techcomp GC-7920) equipped with a thermal conductivity detector (TCD). The apparent quantum

efficiency (AQE) was measured under Ultraviolet light ( $\lambda=370$  nm). The apparent quantum efficiency (AQE) was tested and calculated according to the equation:

$$AQE = \frac{\text{number of reacted electrons}}{\text{number of incident photons}} \times 100 = \frac{\text{number of evolved H}_2 \text{ molecules} \times 2}{\text{number of incident photons}} \times 100\% \quad (1)$$

### Density functional theory (DFT) calculations

We have employed the first-principles to perform all spin-polarization density functional theory (DFT) calculations within the generalized gradient approximation (GGA) using the Perdew-Burke-Ernzerhof (PBE) formulation. We have chosen the projected augmented wave (PAW) potentials to describe the ionic cores and take valence electrons into account using a plane wave basis set with a kinetic energy cutoff of 450 eV. Partial occupancies of the Kohn–Sham orbitals were allowed using the Gaussian smearing method and a width of 0.05 eV. The electronic energy was considered self-consistent when the energy change was smaller than  $10^{-5}$  eV. The Brillouin zone integral uses the surfaces structures of  $2 \times 2 \times 1$  monkhorst pack K point sampling for surface structures. A geometry optimization was considered convergent when the energy change was smaller than  $0.05 \text{ eV } \text{\AA}^{-1}$ . Finally, the adsorption energies ( $E_{\text{ads}}$ ) were calculated as:

$$E_{\text{ads}} = E_{\text{ad/sub}} - E_{\text{ad}} - E_{\text{sub}} \quad (2)$$

where  $E_{\text{ad/sub}}$ ,  $E_{\text{ad}}$ , and  $E_{\text{sub}}$  are the total energies of the optimized adsorbate/substrate system, the adsorbate in the gas phase, and the clean substrate, respectively. The free energy ( $\Delta G$ ) for elemental reaction step was calculated as:

$$\Delta G = \Delta E + \Delta E_{\text{ZPE}} - T\Delta S \quad (3)$$

where  $\Delta E$  is the difference between the total energy,  $\Delta E_{\text{ZPE}}$  and  $\Delta S$  are the differences in the zero-point energy and the change of entropy,  $T$  is the temperature ( $T = 300$  K in this work), respectively.

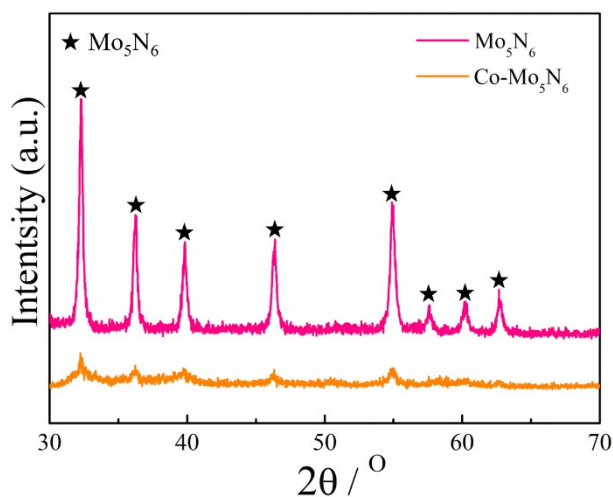

**Figure S1.** XRD patterns of  $\text{Mo}_5\text{N}_6$  and  $\text{Co-Mo}_5\text{N}_6$ .

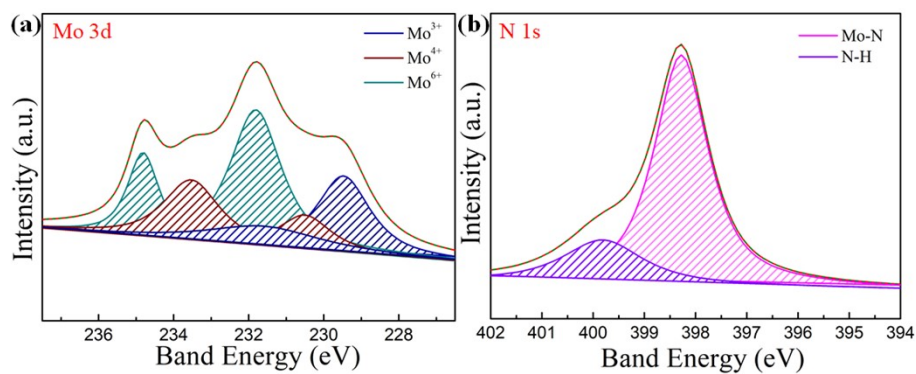

**Figure S2.** XPS spectra of  $\text{Mo}_5\text{N}_6$ : (a) Mo 3d and (b) N 1s.

**Table S1.** Element content table of  $\text{Co-Mo}_5\text{N}_6/\text{g-C}_3\text{N}_4$  hybrids.

| Element | Weight percentage (100%) |
|---------|--------------------------|
| C       | 45.94                    |
| N       | 51.4                     |

|    |      |
|----|------|
| Mo | 1.18 |
| Co | 1.48 |

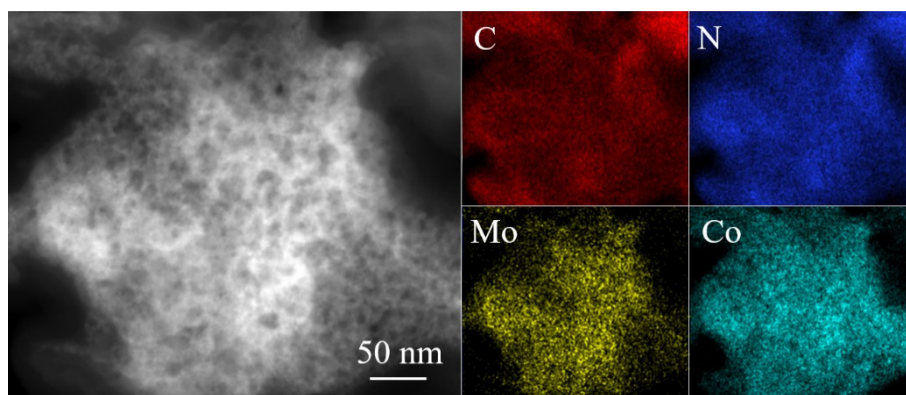

**Figure S3.** TEM-EDX element mapping of Co-Mo<sub>5</sub>N<sub>6</sub>/g-C<sub>3</sub>N<sub>4</sub> hybrids.

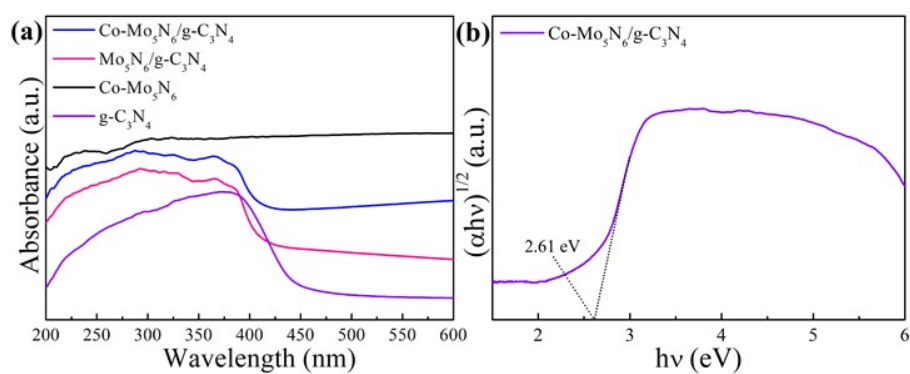

**Figure S4.** (a) UV-Vis light absorption of all samples and (b) band gap values spectra of pure g-C<sub>3</sub>N<sub>4</sub> NSs.

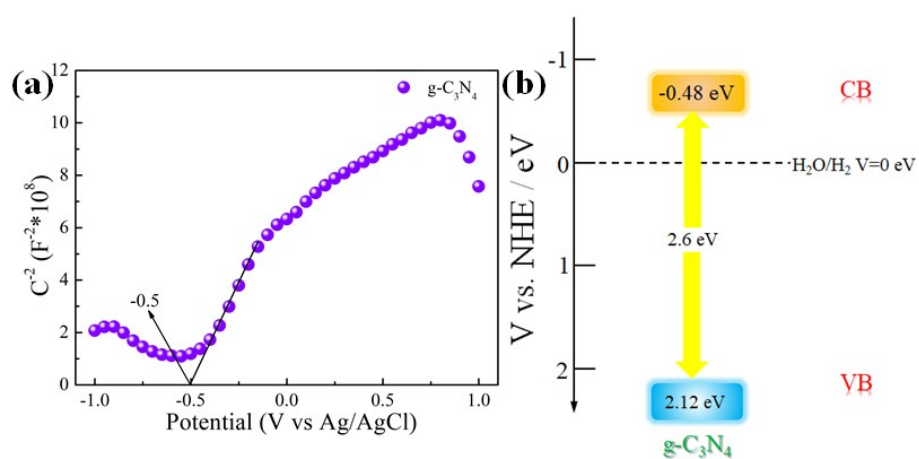

**Figure S5.** (a) Mott-Schottky plots and (b) schematic diagram of the band gap of pure g-C<sub>3</sub>N<sub>4</sub> NSs.

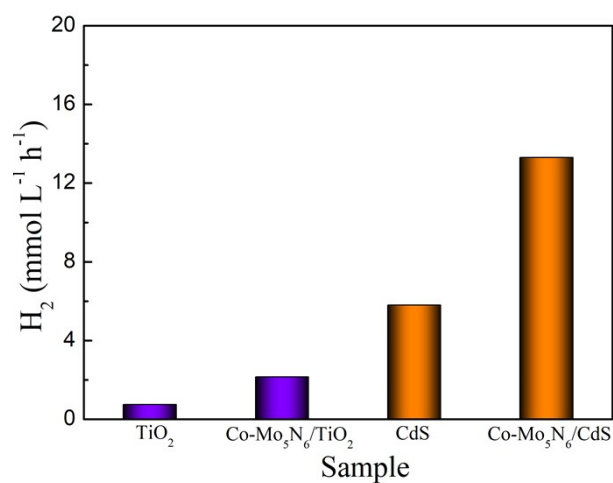

**Figure S6.** Photocatalytic H<sub>2</sub> production rates of TiO<sub>2</sub>, Co-Mo<sub>5</sub>N<sub>6</sub>/TiO<sub>2</sub>, CdS and Co-Mo<sub>5</sub>N<sub>6</sub>/CdS.

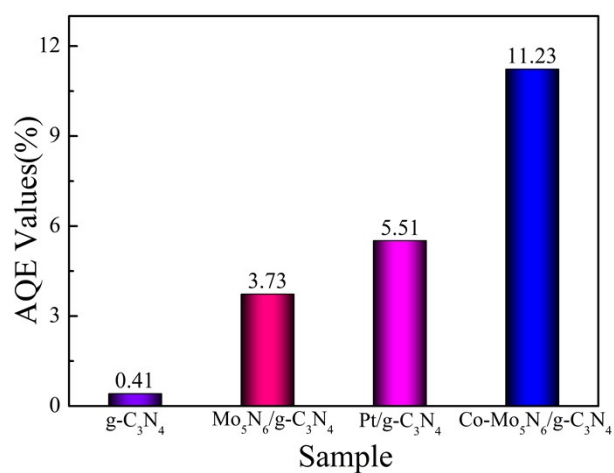

**Figure S7.** AQE values under light at  $\lambda=370$  nm of pure g-C<sub>3</sub>N<sub>4</sub> NSs, Mo<sub>5</sub>N<sub>6</sub>/g-C<sub>3</sub>N<sub>4</sub> and Co-Mo<sub>5</sub>N<sub>6</sub>/g-C<sub>3</sub>N<sub>4</sub> hybrids.

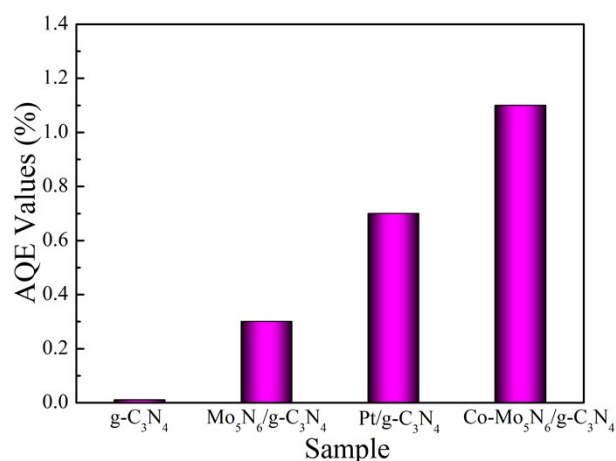

**Figure S8.** AQE values under light at  $\lambda=456$  nm of pure g-C<sub>3</sub>N<sub>4</sub> NSs, Mo<sub>5</sub>N<sub>6</sub>/g-C<sub>3</sub>N<sub>4</sub>, Pt/g-C<sub>3</sub>N<sub>4</sub>, and Co-Mo<sub>5</sub>N<sub>6</sub>/g-C<sub>3</sub>N<sub>4</sub> hybrids.

**Table S2.** The summary of photocatalytic H<sub>2</sub> production activity of the photocatalysts.

| Photocatalysts                                                              | Photocatalytic H <sub>2</sub> production activity                                                                               | Refs.     |
|-----------------------------------------------------------------------------|---------------------------------------------------------------------------------------------------------------------------------|-----------|
| Co@g-C <sub>3</sub> N <sub>4</sub>                                          | 2481 $\mu\text{mol h}^{-1} \text{g}^{-1}$<br>(50 mg, 10 vol% TEOA, 3 wt % Pt)                                                   | 1         |
| 0.6 % Bi <sub>2</sub> S <sub>3</sub> /g-C <sub>3</sub> N <sub>4</sub>       | 3394.1 $\mu\text{mol g}^{-1} \text{h}^{-1}$<br>(30 mg, 0.35 M of Na <sub>2</sub> S, 0.25 M of Na <sub>2</sub> SO <sub>3</sub> ) | 2         |
| B-CNNT/CoP-<br>2.45%                                                        | 784 $\mu\text{mol h}^{-1} \text{g}^{-1}$<br>(50 mg, 10 vol% TEOA)                                                               | 3         |
| CN/Sn <sub>3</sub> O <sub>4</sub> -3                                        | 1961.4 $\mu\text{mol g}^{-1} \text{h}^{-1}$<br>(50 mg, 10 vol% TEOA)                                                            | 4         |
| 3Ru-15Ti <sub>3</sub> AlC <sub>2</sub> /g-<br>C <sub>3</sub> N <sub>4</sub> | 1445 $\mu\text{mol L}^{-1} \text{h}^{-1} \text{g}^{-1}$<br>(100 mg, 100 mL solution of 5% methanol-water)                       | 5         |
| BPNS/CdS                                                                    | 57.64 $\mu\text{mol L}^{-1} \text{h}^{-1}$<br>(60 mg, N <sub>2</sub> , 250 mL H <sub>2</sub> O of 1 vol % methanol)             | 6         |
| Co-Mo <sub>5</sub> N <sub>6</sub> /g-C <sub>3</sub> N <sub>4</sub>          | 3690.37 $\mu\text{mol g}^{-1} \text{h}^{-1}$<br>(20 mg, 100 mL H <sub>2</sub> O of 20 vol % TEOA)                               | This work |

- [1] W. Zhang, Y. Fu, Q. Peng, Q. Yao, X. Wang, A. Yu, Z. Chen, Chem. Eng. J. 394 (2020) 124822.  
 [2] B. Zhang, H. Shi, Y. Yan, C. Liu, X. Hu, E. Liu, J. Fan, Colloid. Surface A. 608 (2021) 125598.  
 [3] Y. Jiao, Y. Li, J. Wang, Z. He, Z. Li, J. Colloid Interface Sci. 595 (2021) 69-77.  
 [4] Y. Zhu, Y. Cui, B. Xiao, J. Ou-yang, H. Li, Z. Chen, Mater. Sci. Semicond. Process. 129 (2021) 105767.  
 [5] B. Tahir, M. Tahir, Mater. Res. Bull. 144 (2021) 111493.  
 [6] Z. Shen, Y. Yuan, P. Wang, W. Bai, L. Pei, S. Wu, Z. Yu, Z. Zou, ACS Appl. Mater. Interfaces 12.15 (2020) 17343-17352.
